# Supplementary material for: Late-differentiated effector neoantigen-specific CD8+ T cells are enriched in peripheral blood of non-small cell lung carcinoma patients responding to atezolizumab treatment
Source: PubMed Central journal article supplement (PMC6740011; doi:10.1186/s40425-019-0695-9), 2019-09-12
Supplement: 40425_2019_695_MOESM3_ESM.pdf [file 40425_2019_695_MOESM3_ESM.pdf]

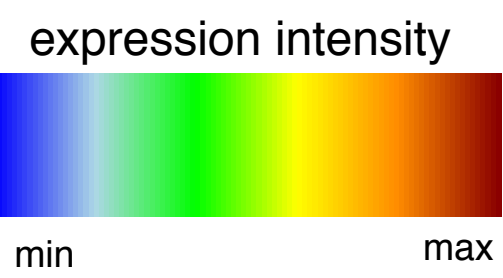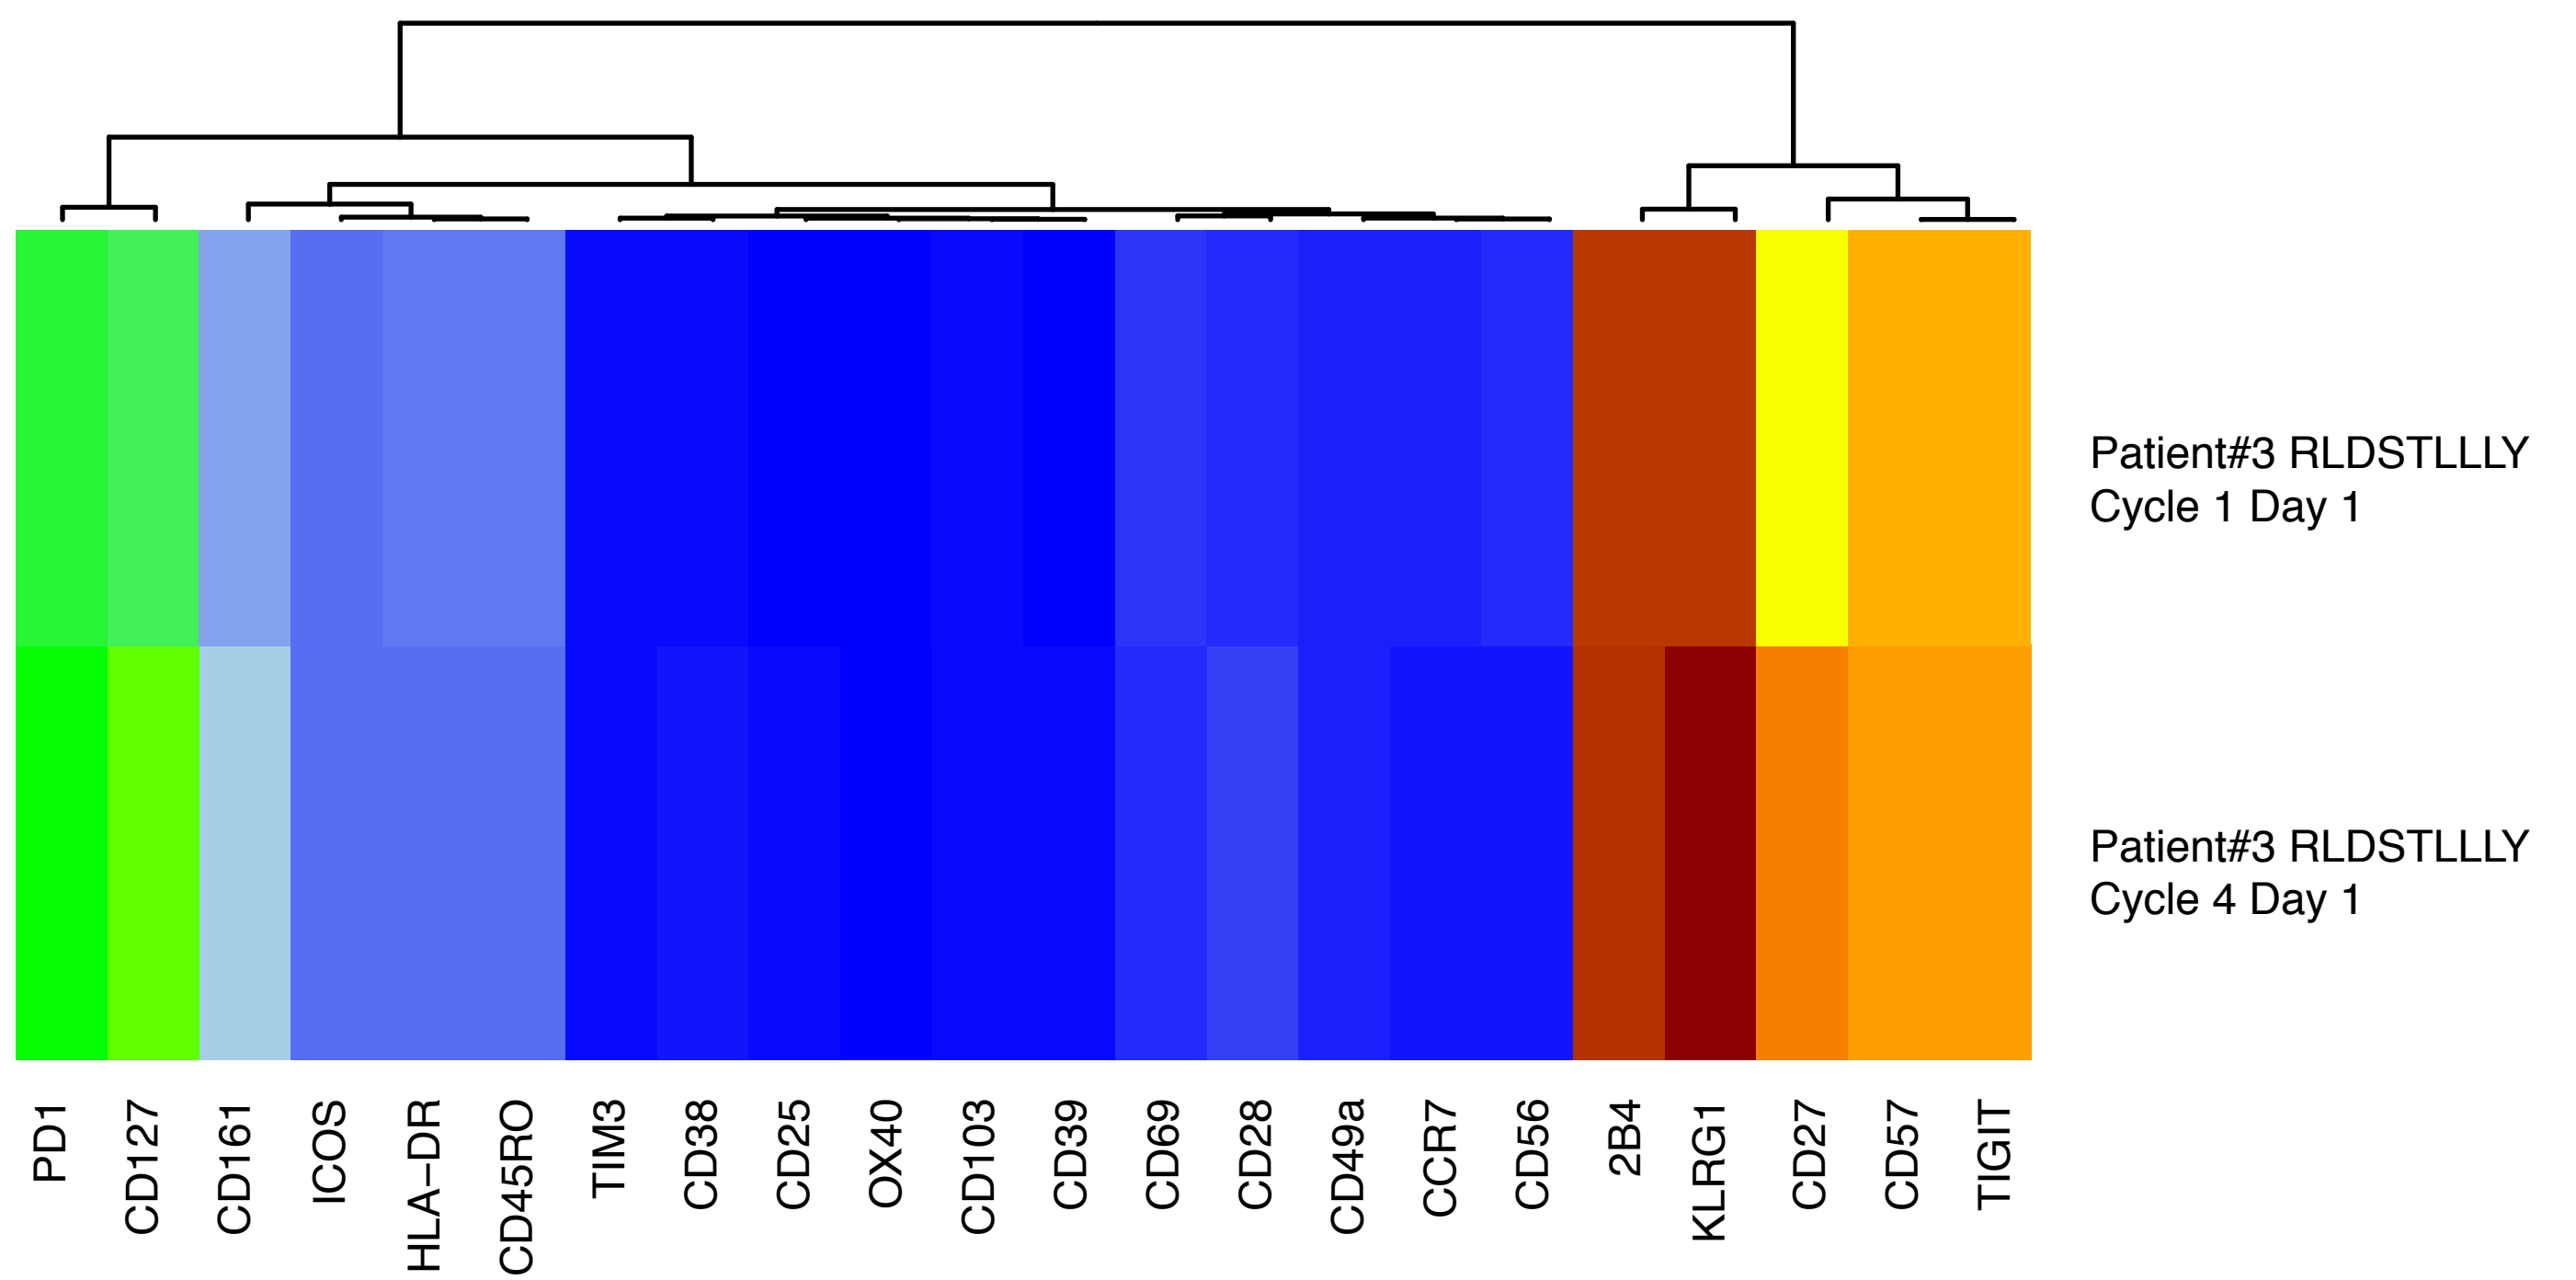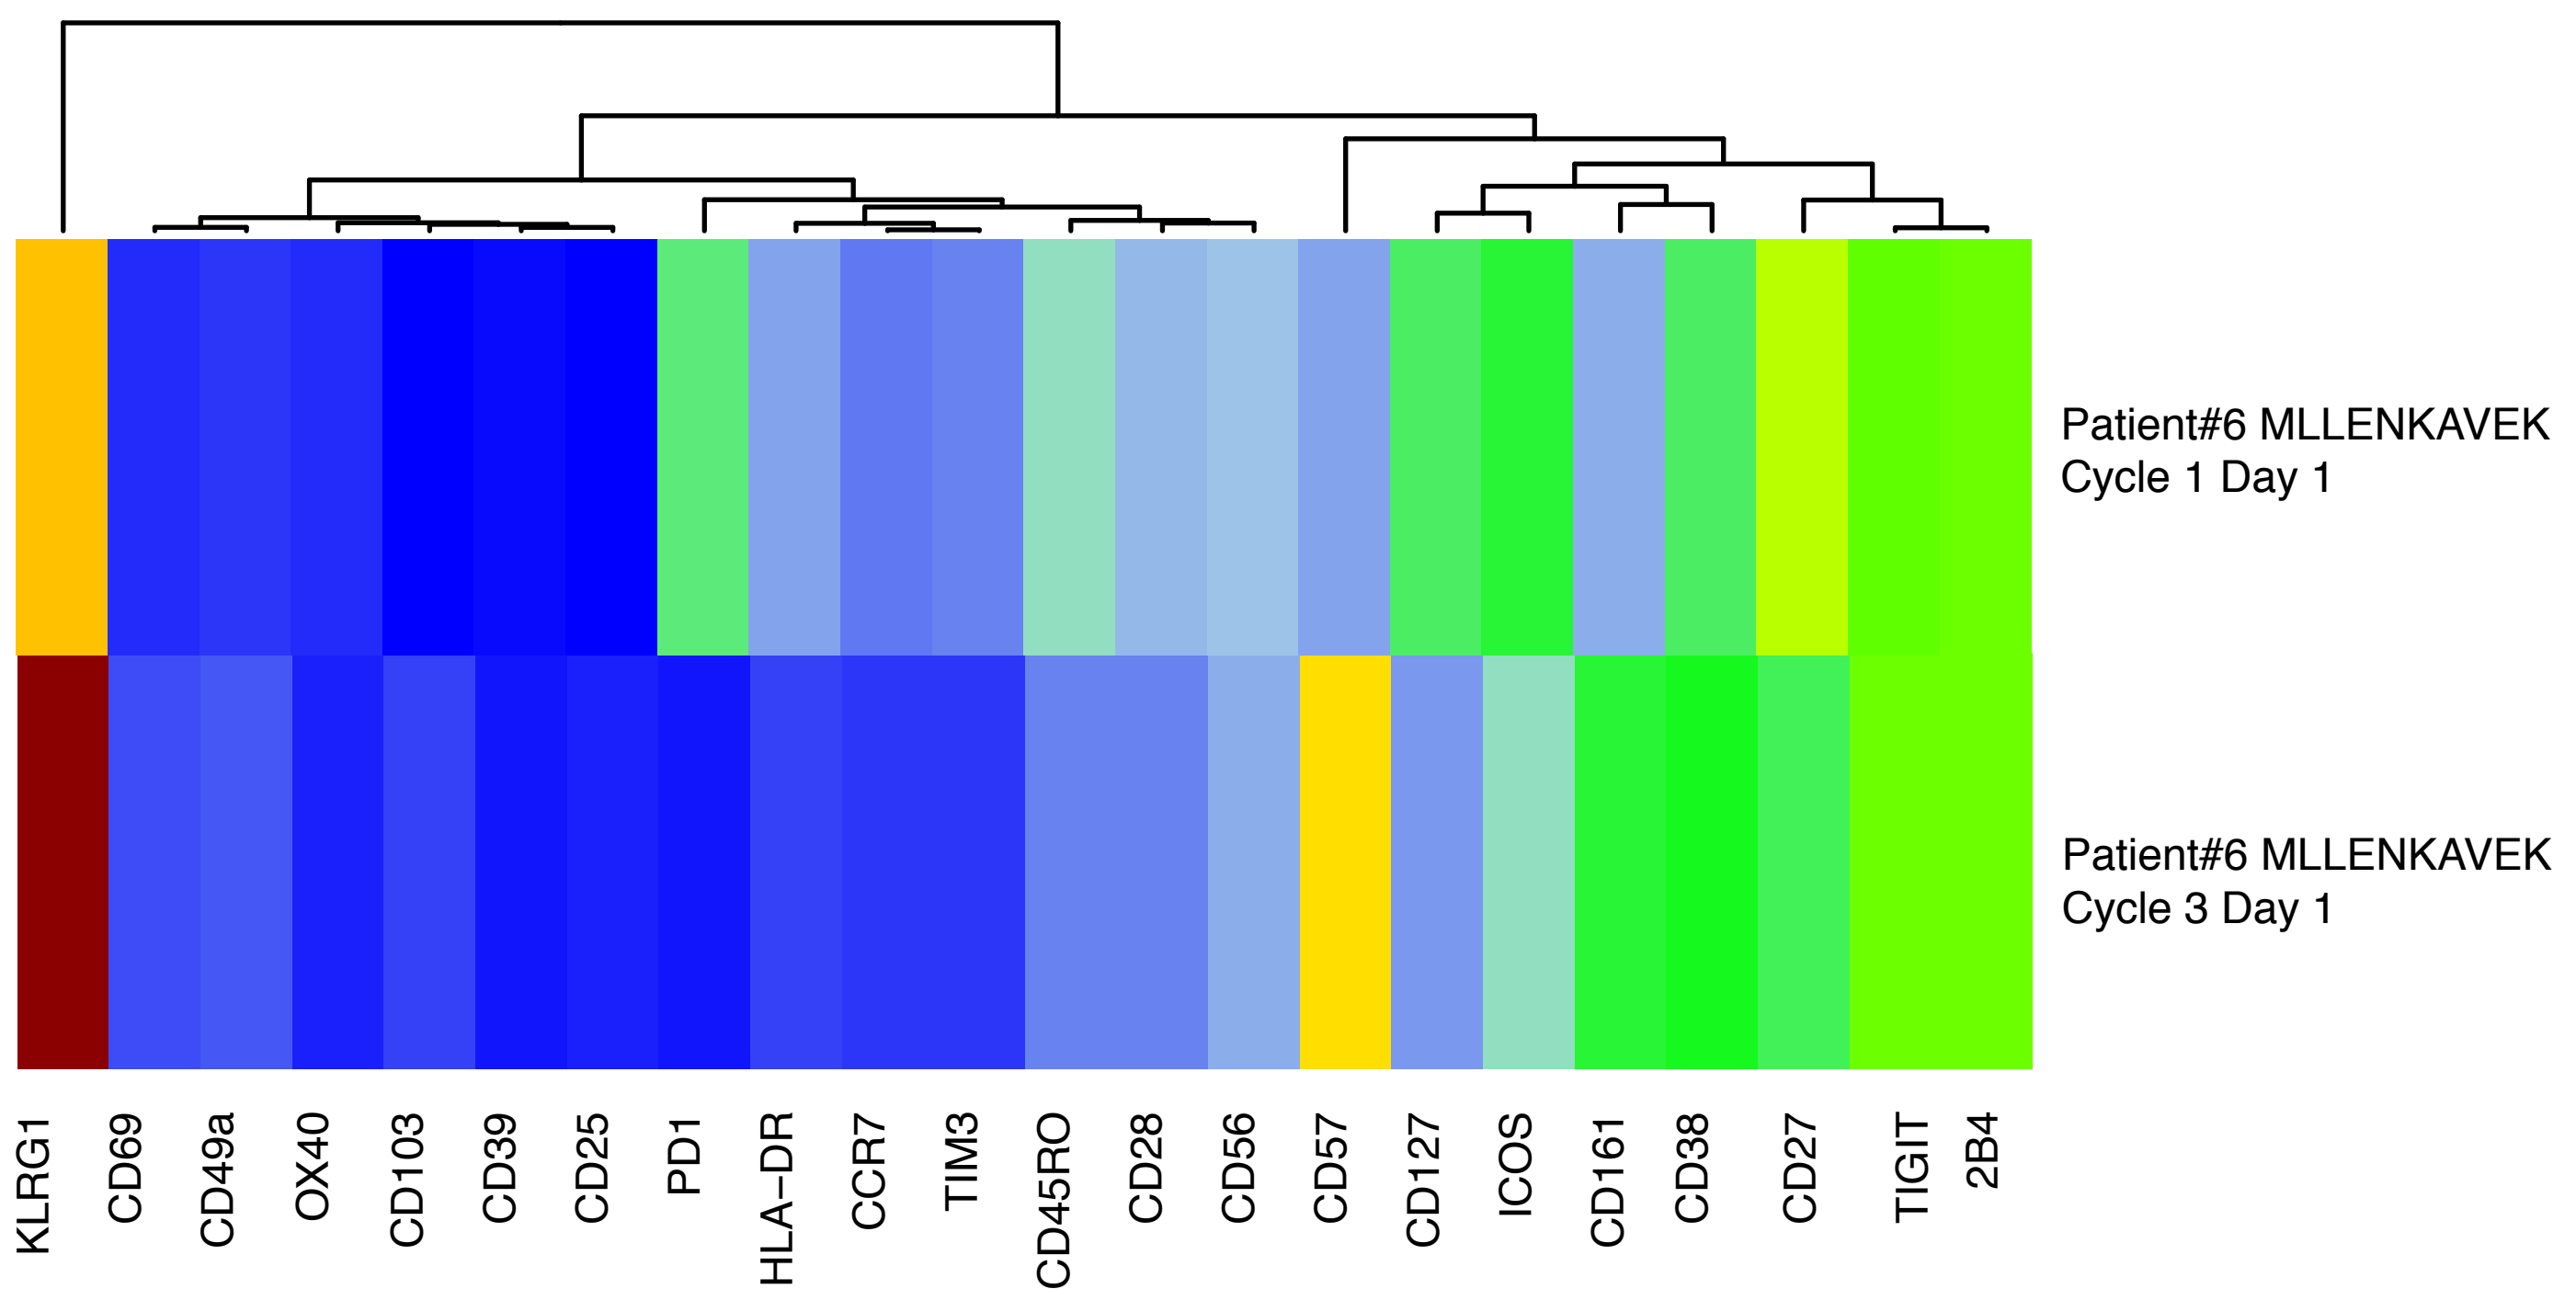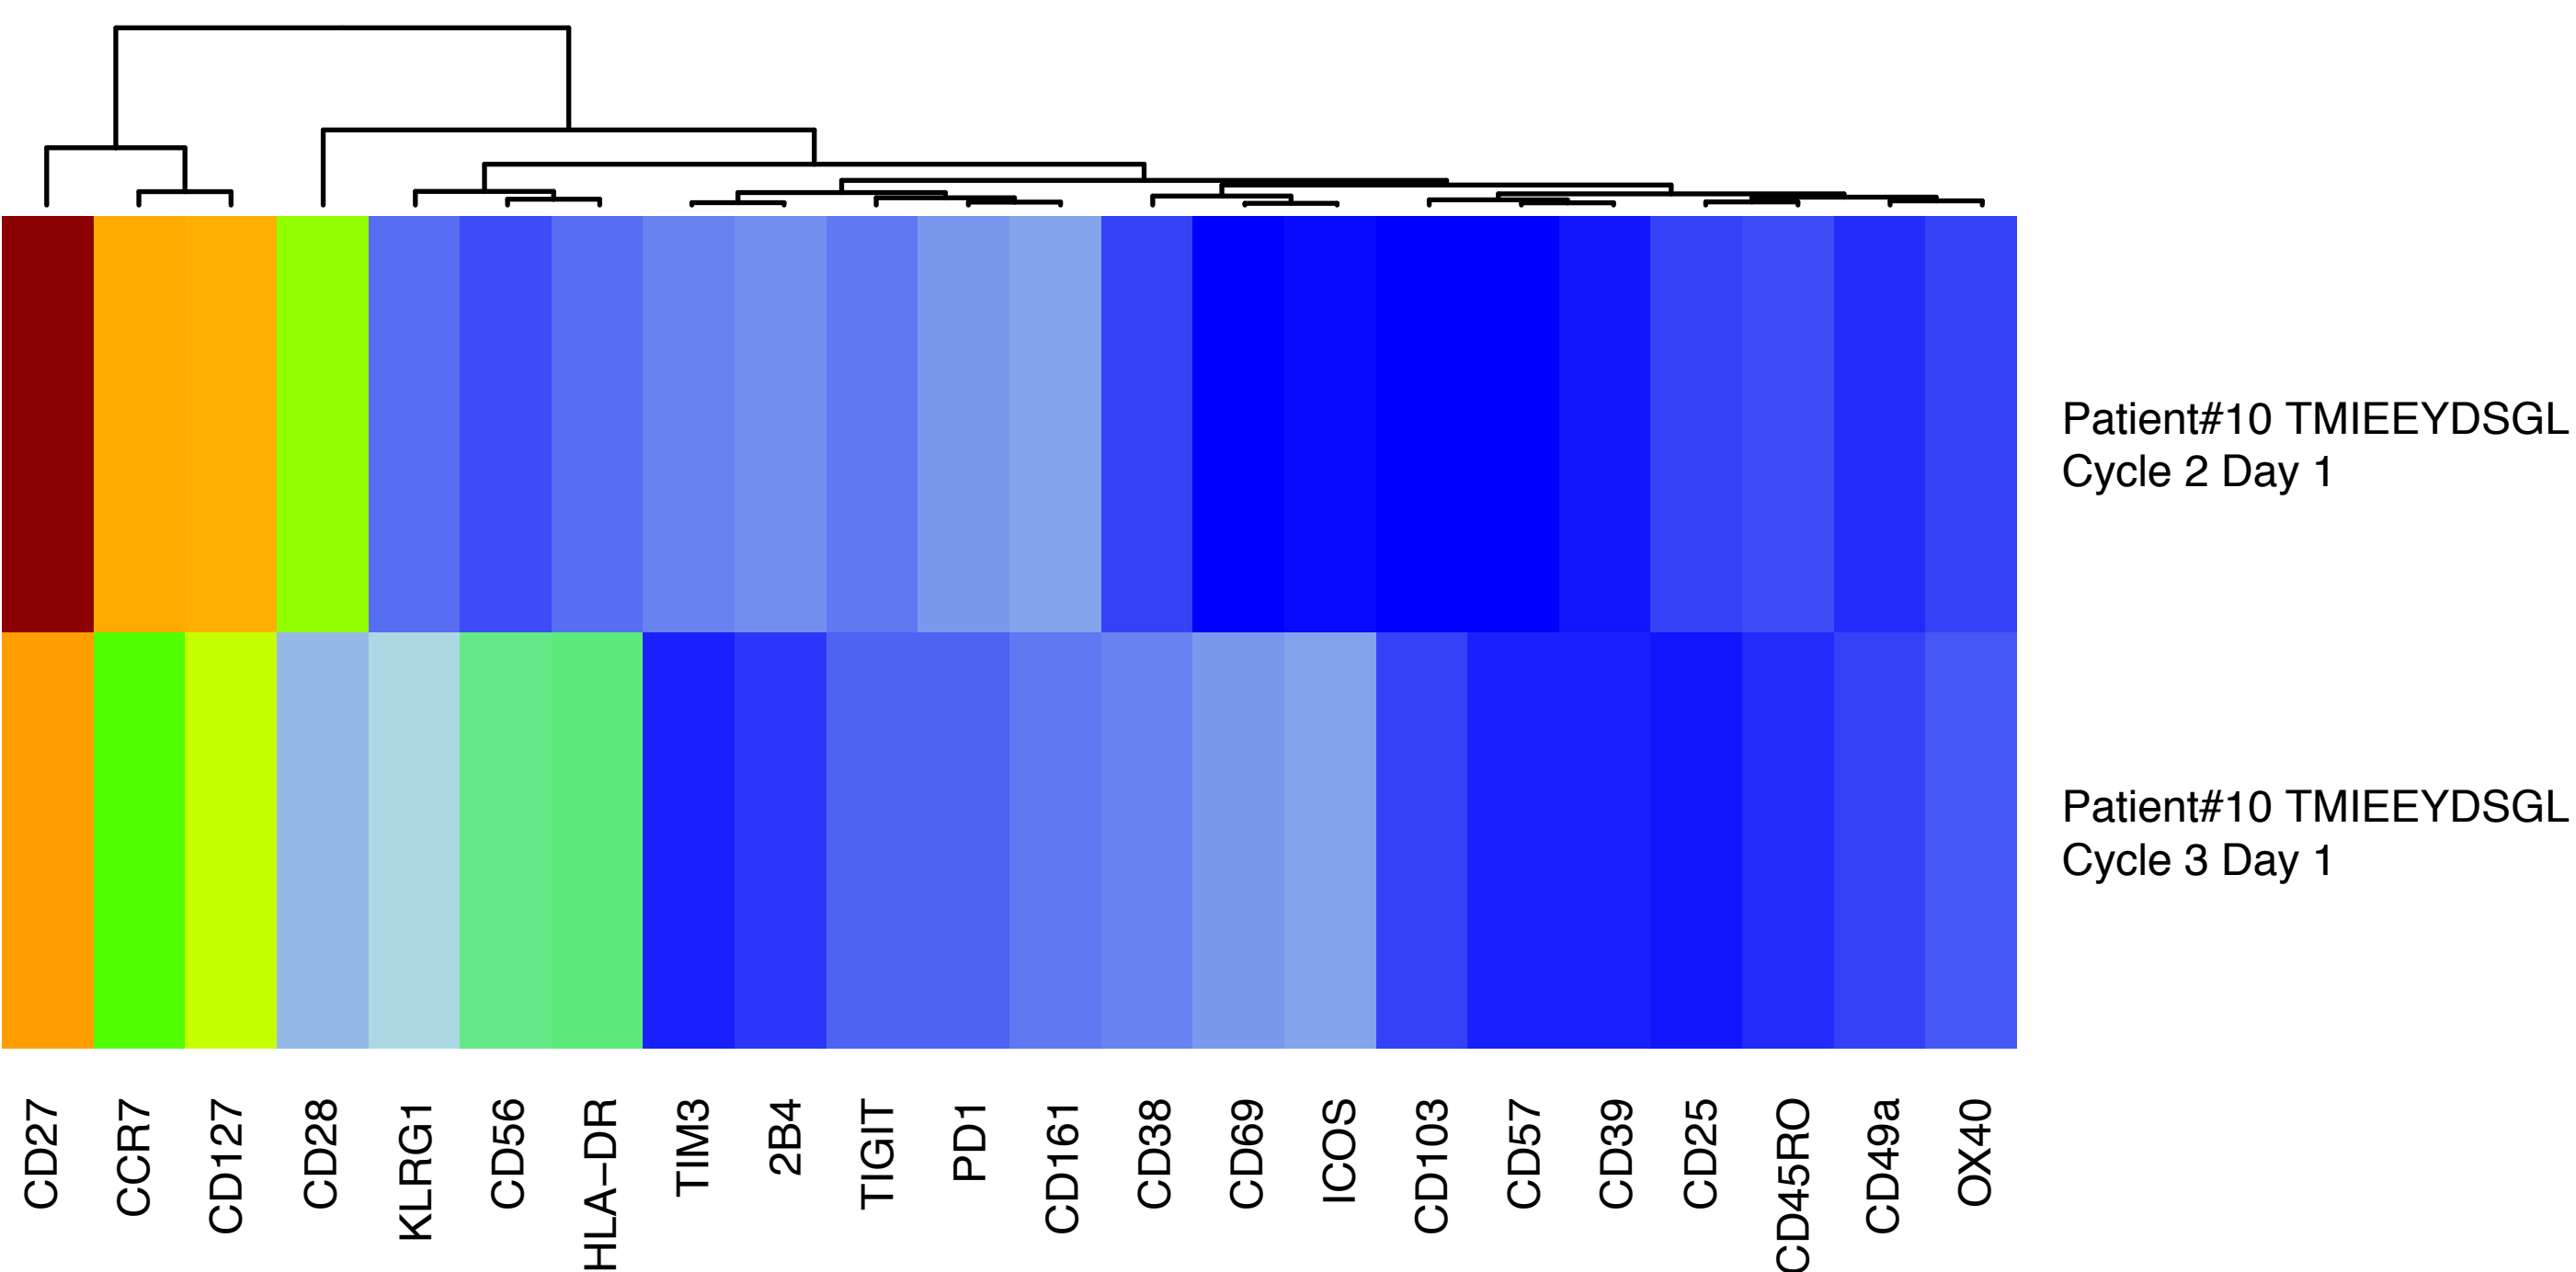

Supplementary Figure 2
